# Supplementary material for: A high-temperature organic–inorganic ferroelectric with outstanding switchable dielectric characteristics
Source: Royal Society of Chemistry journal article supplement (doi:10.1039/c7ra10221f), 2017-01-01
Supplement: c7ra10221f1.pdf [file c7ra10221f1.pdf]

## Electronic Supplementary Information

### A High-temperature Organic-inorganic Ferroelectric with Outstanding Switchable Dielectric Characteristics

Cong Xu, Wenjun Zhang, Linsong Gao, Xuecheng Gan, Xiaofan Sun, Zepeng Cui, Hong-Ling Cai\*  
and X. S. Wu\*

Collaborative Innovation Center of Advanced Microstructures, Lab of Solid State Microstructures,  
School of Physics, Nanjing University, Nanjing 210093, China

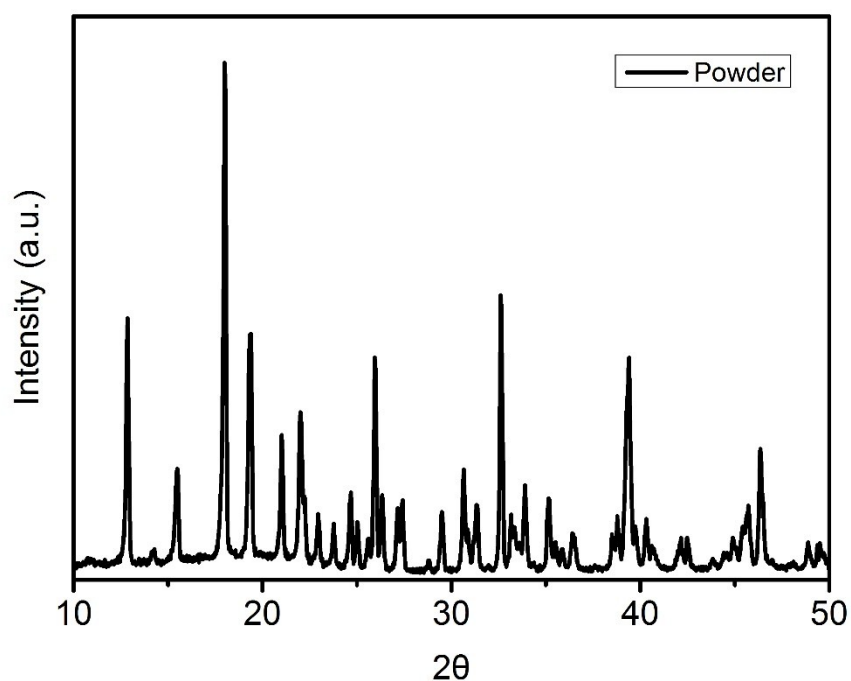

**Figure S1:** Powder X-ray diffraction (PXRD) pattern of the compound at room temperature.

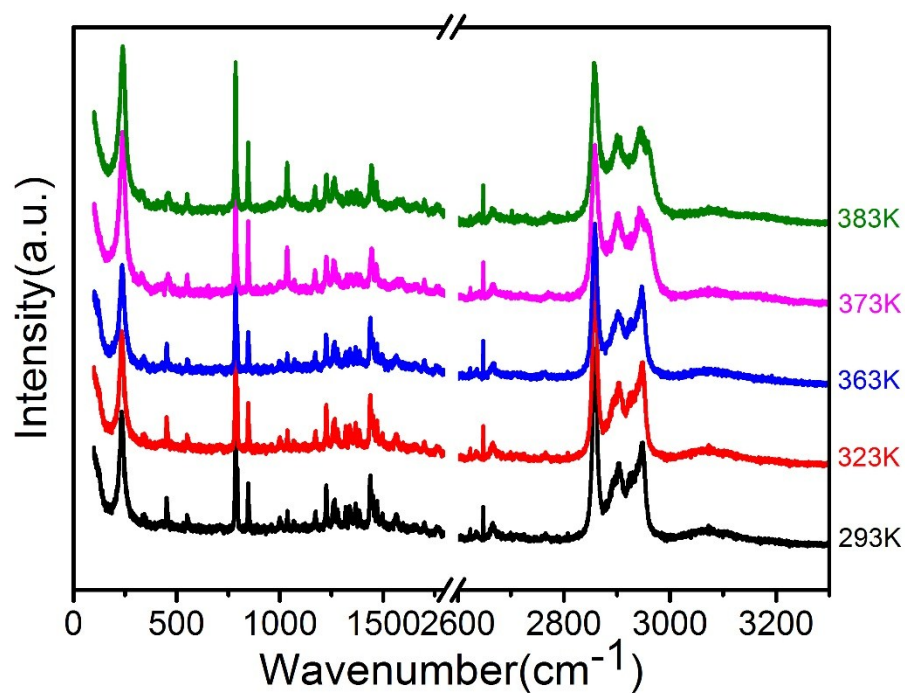

**Figure S2:** Raman spectra of the compound at 293K, 323K, 363K, 373K and 383K.

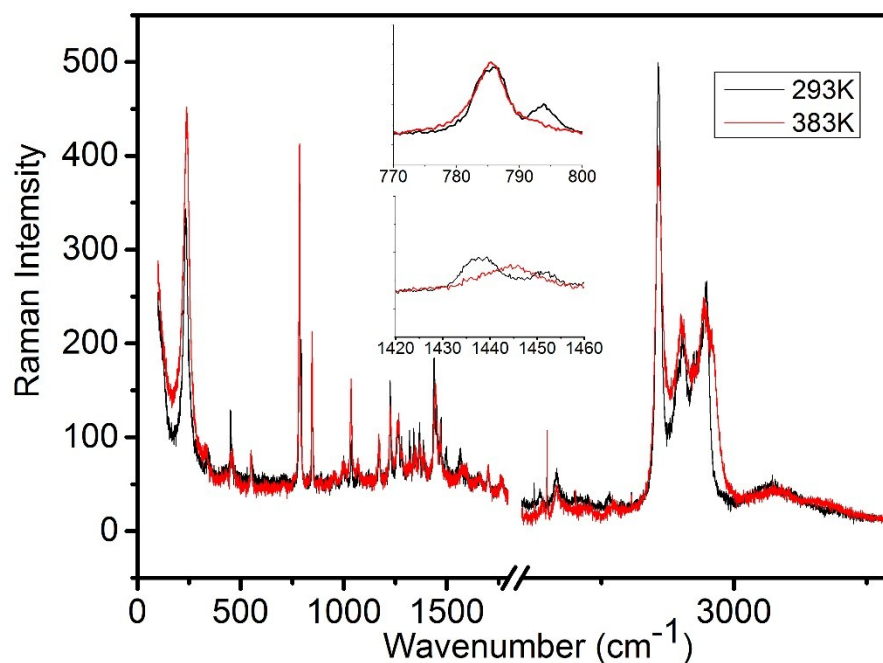

**Figure S3:** Raman spectra at RTP and HTP. The peaks at  $785\text{ cm}^{-1}$  and  $1445\text{ cm}^{-1}$  split at room temperature, which indicates the symmetry breaking of CHA cations.

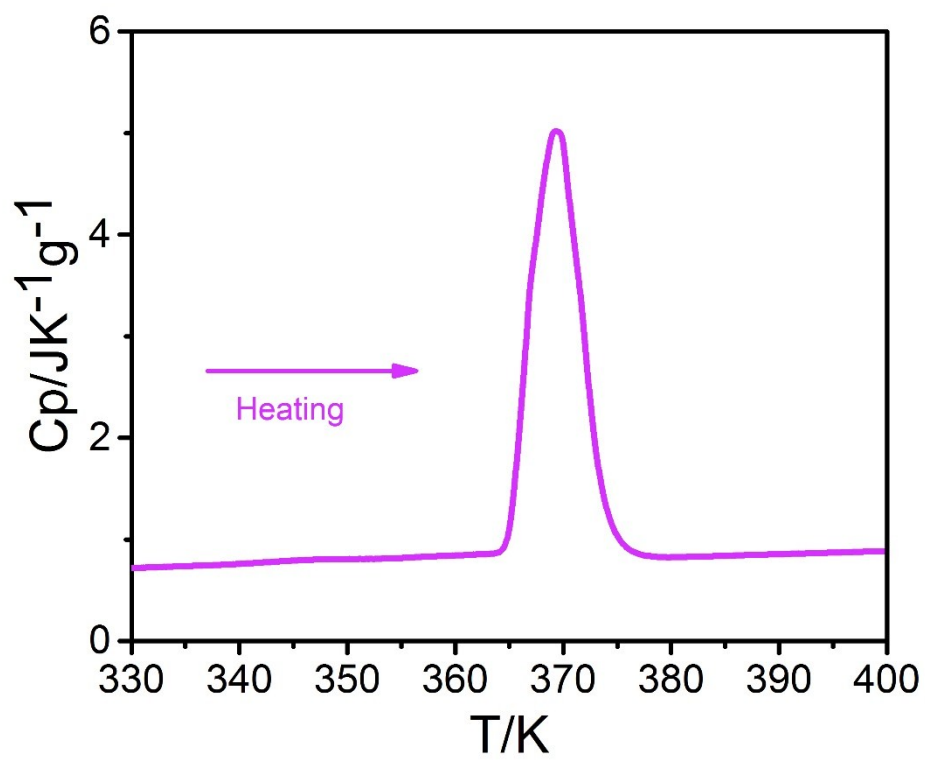

**Figure S4:** The temperature dependence of  $C_p$  of the compound in the heating process.
